# Supplementary material
Source: publisher figshare collection journal article supplement (https://acs.figshare.com/ndownloader/files/4088011)
Supplement: Supplementary file 1 [file 4088011]

# SUPPORTING INFORMATION

to

## **Timed-Release Polymer Nanoparticles**

*Nguyen T. D. Tran<sup>1</sup>, Nghia P. Truong<sup>1</sup>, Wenyi Gu<sup>1</sup>, Zhongfan Jia<sup>1</sup>, Matthew A Cooper<sup>2</sup>, Michael J. Monteiro<sup>1\*</sup>*

---

Australian Institute for Bioengineering and Nanotechnology

The University of Queensland

Brisbane QLD 4072, Australia

E-mail: m.monteiro@uq.edu.au

**Scheme S1.** Self-catalyzed hydrolysis of Poly(2-dimethylaminoethyl acrylate).

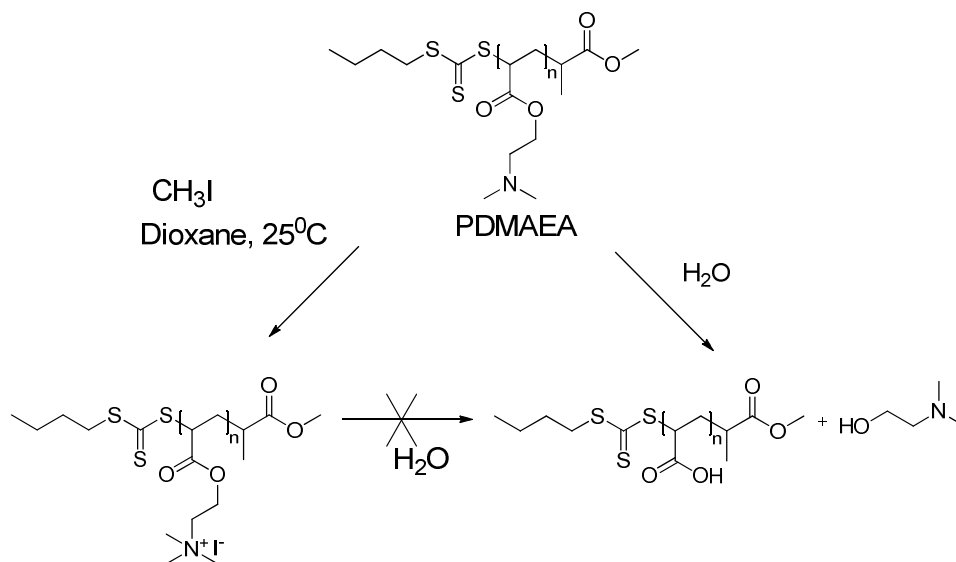

**Scheme S2.** Synthesis of folic acid functional copolymer H

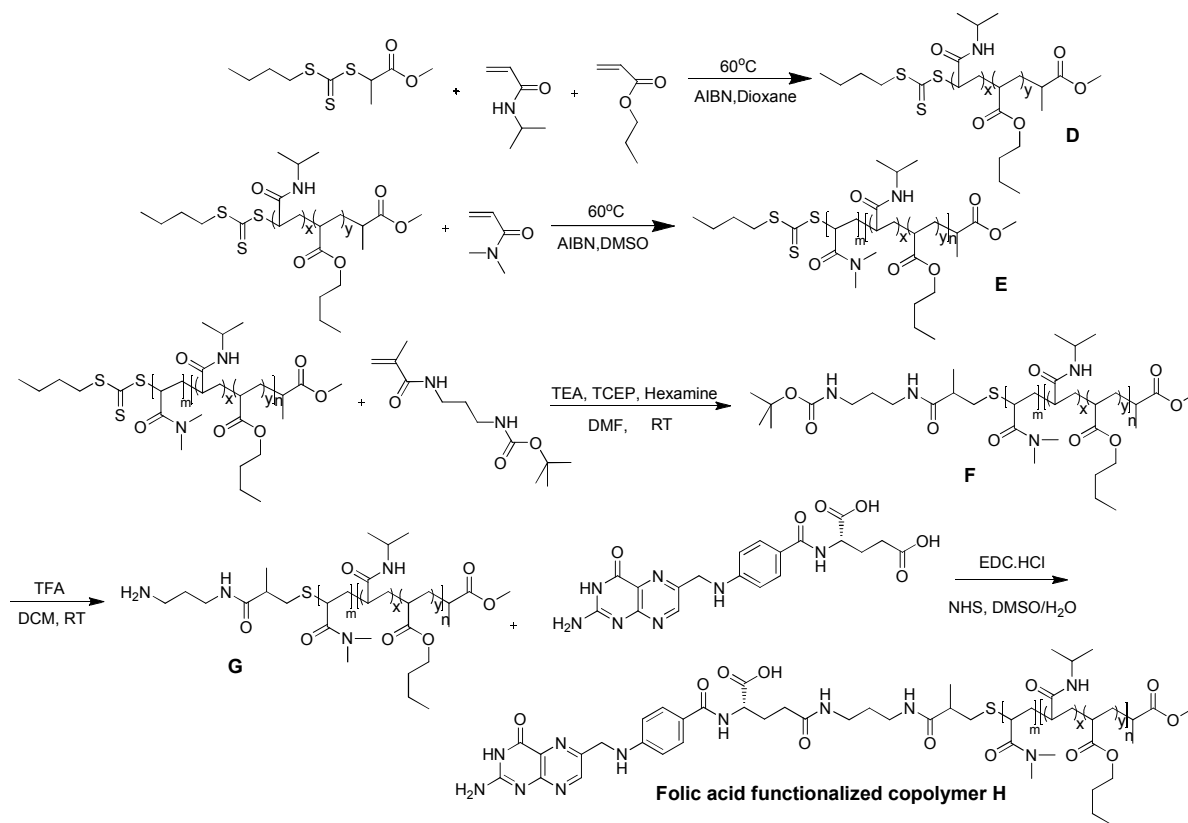

**Table S1. Molecular weights, polydispersities (PDI), and  $^1\text{H}$  NMR data of RAFT polymerization of thermo responsive block copolymers at 60 °C in Dioxane.**

| Polymer code <sup>a</sup> |                                                                                              | SEC <sup>b</sup> |      |                               |       | $^1\text{H}$ NMR   |                 |                 |                  |         |                                           |
|---------------------------|----------------------------------------------------------------------------------------------|------------------|------|-------------------------------|-------|--------------------|-----------------|-----------------|------------------|---------|-------------------------------------------|
|                           |                                                                                              | RI               |      | Triple detection <sup>c</sup> |       | Repeating units    |                 |                 |                  | $M_n^i$ | Percent age of BA or STY (%) <sup>k</sup> |
|                           |                                                                                              | $M_n$            | PDI  | $M_n$                         | $M_w$ | NIPAM <sup>d</sup> | DMAEA           | BA <sup>e</sup> | STY <sup>f</sup> |         |                                           |
| <b>A</b>                  | P(DMA <sub>96</sub> -b-(NIPAM <sub>87</sub> -co-DMAEA <sub>25</sub> ))                       | 34500            | 1.23 | 23800                         | 24000 | 87                 | 25 <sup>g</sup> | -               | -                | 23175   | -                                         |
| <b>B1</b>                 | P(DMA <sub>96</sub> -b-(NIPAM <sub>88</sub> -co-DMAEA <sub>25</sub> -co-BA <sub>6</sub> ))   | 36200            | 1.24 | 28500                         | 28900 | 88                 | 25 <sup>h</sup> | 6               | -                | 24057   | 5.04                                      |
| <b>B2</b>                 | P(DMA <sub>96</sub> -b-(NIPAM <sub>91</sub> -co-DMAEA <sub>25</sub> -co-BA <sub>12</sub> ))  | 36700            | 1.26 | 24000                         | 24300 | 91                 | 25 <sup>h</sup> | 12              | -                | 25165   | 9.38                                      |
| <b>C1</b>                 | P(DMA <sub>96</sub> -b-(NIPAM <sub>84</sub> -co-DMAEA <sub>22</sub> -co-STY <sub>5</sub> ))  | 34300            | 1.32 | 24800                         | 25700 | 84                 | 22 <sup>g</sup> | -               | 5                | 22927   | 4.50                                      |
| <b>C2</b>                 | P(DMA <sub>96</sub> -b-(NIPAM <sub>40</sub> -co-DMAEA <sub>15</sub> -co-STY <sub>13</sub> )) | 24700            | 1.27 | 24100                         | 24900 | 40                 | 15 <sup>g</sup> | -               | 13               | 17786   | 19.11                                     |

<sup>a</sup> PDMA (Macro-CTA) with repeating unit = 96;  $M_n$  = 9769 calculated from  $^1\text{H}$  NMR. <sup>b</sup> SEC data measured in DMAc solution with 0.03 wt% of LiCl and using PSTY standards for calibration. <sup>c</sup> Triple detection data measured based on the  $dn/dc$  calculated from the polymers' concentration. <sup>d</sup> Repeating units of NIPAM ( $N_{\text{NIPAM}}$ ) determined by  $^1\text{H}$  NMR were calculated based on 96 repeating unit of Macro-CTA by the integral area of a peak at 1.08 ppm ( $I_{1.08}$ ) and a peak in the range 2.85-3.07 ppm ( $I_{2.85-3.07}$ ) using the following equation:  $N_{\text{NIPAM}} = 96 \times I_{1.08} / I_{2.85-3.07}$ . <sup>e</sup> Repeating units of BA ( $N_{\text{BA}}$ ) determined by  $^1\text{H}$  NMR were calculated based on 96 repeating unit of Macro-CTA by the integral area of a peak at 0.88 ppm ( $I_{0.88}$ ) and a peak in the range 2.85-3.07 ppm ( $I_{2.85-3.07}$ ) using the following equation:  $N_{\text{BA}} = (96 \times 2 \times I_{0.88} / I_{2.85-3.07}) - 1$ . <sup>f</sup> Repeating units of STY ( $N_{\text{STY}}$ ) determined by  $^1\text{H}$  NMR were calculated based on 96 repeating unit of Macro-CTA and the  $N_{\text{NIPAM}}$  by the integral area of the peak in the range 6.20-7.18 ppm ( $I_{6.20-7.18}$ ) and the peak in the range 2.85-3.07 ppm ( $I_{2.85-3.07}$ ) using the following equation:  $N_{\text{STY}} = [(96 \times 6 \times I_{6.20-7.18}) / I_{2.85-3.07} - N_{\text{NIPAM}}] / 5$ . <sup>g</sup> Repeating units of DMAEA ( $N_{\text{DMAEA}}$ ) determined by  $^1\text{H}$  NMR were calculated based on 96 repeating unit of Macro-CTA and the  $N_{\text{NIPAM}}$  by the integral area of the peak in the range 2.85-3.07 ppm ( $I_{2.85-3.07}$ ) and the peak in the range 3.95-4.30 ppm ( $I_{3.95-4.30}$ ) using the following equation:  $N_{\text{DMAEA}} = [(96 \times 6 \times I_{3.95-4.30} / I_{2.85-3.07}) - N_{\text{NIPAM}}] / 2$ . <sup>h</sup> Repeating units of DMAEA ( $N_{\text{DMAEA}}$ ) determined by  $^1\text{H}$  NMR were calculated based on 96 repeating unit of Macro-CTA, and the  $N_{\text{NIPAM}}$  and  $N_{\text{BA}}$  by the integral area of the peak in the range 2.85-3.07 ppm ( $I_{2.85-3.07}$ ) and the peak in the range 3.95 - 4.30 ppm ( $I_{3.95-4.30}$ ) using the following equation:  $N_{\text{DMAEA}} = [(96 \times 6 \times I_{3.95-4.30} / I_{2.85-3.07}) - (N_{\text{NIPAM}} + 2 N_{\text{BA}})] / 2$ . <sup>i</sup> Molecular weight determined by  $^1\text{H}$  NMR were calculated based on the repeating units of  $N_{\text{NIPAM}}$ ,  $N_{\text{BA}}$  or  $N_{\text{STY}}$ ,  $N_{\text{DMAEA}}$ , and the molecular weight of macro-CTA:  $M_n = (N_{\text{NIPAM}} \times 113) + (N_{\text{BA}} \times 128.2)$  or  $(N_{\text{STY}} \times 104) + (N_{\text{DMAEA}} \times 143) + 9769$ . <sup>k</sup> Percentages of BA or STY were calculated based on  $N_{\text{DMAEA}}$ ,  $N_{\text{NIPAM}}$ ,  $N_{\text{BA}}$  or  $N_{\text{STY}}$ : Percentage of BA =  $N_{\text{BA}} / (N_{\text{DMAEA}} + N_{\text{NIPAM}} + N_{\text{BA}})$  and percentage of STY =  $N_{\text{STY}} / (N_{\text{DMAEA}} + N_{\text{NIPAM}} + N_{\text{STY}})$ .

**Table S2:** Hydrodynamic diameter ( $D_h$ ), Polydispersities (PDIs) of thermoresponsive block copolymers and their Oligo DNA 9-27 complexes in Milli-Q water at N/P Ratio 0.5, 1, 2, 5, and 10 with 1  $\mu$ g DNA. Measurements were carried out on DLS machine at 37 °C.

| N/P ratio                 | Polymer B1/oligo DNA complexes |       | Polymer B2/oligo DNA complexes |       | Polymer C1/oligo DNA complexes |       | Polymer C2/oligo DNA complexes |       |
|---------------------------|--------------------------------|-------|--------------------------------|-------|--------------------------------|-------|--------------------------------|-------|
|                           | $D_h$ (nm)                     | PDI   |
| 0.5                       | $30.33 \pm 6.58$               | 0.413 | $27.16 \pm 2.14$               | 0.356 | $11.10 \pm 1.01$               | 0.453 | $17.20 \pm 4.29$               | 0.389 |
| 1                         | $29.49 \pm 3.44$               | 0.337 | $27.35 \pm 1.23$               | 0.218 | $24.03 \pm 1.07$               | 0.400 | $24.53 \pm 0.86$               | 0.243 |
| 2                         | $14.75 \pm 4.24$               | 0.450 | $24.21 \pm 0.24$               | 0.240 | $9.021 \pm 2.40$               | 0.430 | $24.20 \pm 1.33$               | 0.361 |
| 5                         | $17.72 \pm 8.74$               | 0.488 | $25.56 \pm 0.70$               | 0.168 | $8.872 \pm 2.74$               | 0.560 | $23.75 \pm 0.58$               | 0.214 |
| 10                        | $27.21 \pm 0.20$               | 0.048 | $29.12 \pm 1.02$               | 0.071 | $29.27 \pm 0.69$               | 0.080 | $20.76 \pm 0.54$               | 0.110 |
| Polymer only <sup>a</sup> | $27.75 \pm 1.67$               | 0.063 | $29.87 \pm 0.53$               | 0.047 | $28.02 \pm 1.82$               | 0.087 | $21.22 \pm 0.78$               | 0.100 |

<sup>a</sup> For polymer only, the polymer concentration was 0.5 mg/mL. B1; P(DMA<sub>96</sub>-b-(NIPAM<sub>88</sub>-co-DMAEA<sub>25</sub>-co-BA<sub>6</sub>)), B2; P(DMA<sub>96</sub>-b-(NIPAM<sub>91</sub>-co-DMAEA<sub>25</sub>-co-BA<sub>12</sub>)), C1; P(DMA<sub>96</sub>-b-(NIPAM<sub>84</sub>-co-DMAEA<sub>22</sub>-co-STY<sub>5</sub>)), C2; P(DMA<sub>96</sub>-b-(NIPAM<sub>40</sub>-co-DMAEA<sub>15</sub>-co-STY<sub>13</sub>)). Data were reported as soluble polymers in Milli-Q water were incubated with DNA at N/P Ratio 0.5, 1, 2, 5, and 10 at below their LCST for 30 min prior to be measured at 37 °C on DLS machines. Data were reported as an average of five measurements. The mean standard of deviation of polymer particle sizes was calculated from five measurements.

**Table S3.** Molecular weights, polydispersities (PDIs), and  $^1\text{H}$  NMR data of RAFT polymerization for synthesis of copolymer D and E at 60 °C.

| Polymer code |                                                                     | SEC <sup>a</sup> |      |                               |       | $^1\text{H}$ NMR   |                 |                  |                    |
|--------------|---------------------------------------------------------------------|------------------|------|-------------------------------|-------|--------------------|-----------------|------------------|--------------------|
|              |                                                                     | RI               |      | Triple detection <sup>b</sup> |       | Repeating units    |                 |                  | $M_n$              |
|              |                                                                     | $M_n$            | PDI  | $M_n$                         | $M_w$ | NIPAM <sup>c</sup> | BA <sup>d</sup> | DMA <sup>e</sup> |                    |
| <b>D</b>     | P(NIPAM <sub>97</sub> -co-BA <sub>13</sub> )                        | 28700            | 1.16 | 15900                         | 16100 | 97                 | 13              | -                | 12880 <sup>f</sup> |
| <b>E</b>     | P(DMA <sub>99</sub> -b-(NIPAM <sub>97</sub> -co-BA <sub>13</sub> )) | 38500            | 1.19 | 26900                         | 27200 | -                  | -               | 99               | 22694 <sup>g</sup> |

<sup>a</sup> SEC data measured in DMAc solution with 0.03 wt% of LiCl and using PSTY standards for calibration.

<sup>b</sup> Triple detection data measured based on the  $dn/dc$  calculated from the polymers' concentration.

<sup>c</sup> Repeating units of NIPAM ( $N_{\text{NIPAM}}$ ) determined by  $^1\text{H}$  NMR were calculated by the integral area of a peak at 1.12 ppm ( $I_{1.12}$ ) and a peak at 3.64 ppm ( $I_{3.64}$ ) using the following equation:  $N_{\text{NIPAM}} = I_{1.12} / (2 \times I_{3.64})$

<sup>d</sup> Repeating units of BA ( $N_{\text{BA}}$ ) determined by  $^1\text{H}$  NMR were calculated by the integral area of a peak at 0.89 ppm ( $I_{0.89}$ ) and a peak at 3.64 ppm ( $I_{3.64}$ ) using the following equation:  $N_{\text{BA}} = (I_{0.89} / I_{3.64}) - 1$

<sup>e</sup> Repeating units of DMA ( $N_{\text{DMA}}$ ) determined by  $^1\text{H}$  NMR were calculated based on  $N_{\text{BA}}$  by the integral area of the peak in the range 2.86-3.07 ppm ( $I_{2.86-3.07}$ ) and the peak at 0.89 ppm ( $I_{0.89}$ ) using the following equation:  $N_{\text{DMA}} = [(N_{\text{BA}} + 3) \times I_{2.86-3.07}] / (I_{0.89} \times 6)$

<sup>f</sup> Molecular weight determined by  $^1\text{H}$  NMR were calculated based on the repeating units of  $N_{\text{NIPAM}}$ ,  $N_{\text{BA}}$  and the molecular weight of MCEBTTTC:  $M_n = (N_{\text{NIPAM}} \times 113) + (N_{\text{BA}} \times 128.2) + 252.42$

<sup>g</sup> Molecular weight determined by  $^1\text{H}$  NMR were calculated based on the repeating units of  $N_{\text{DMA}}$  and the molecular weight of macro-CTA:  $M_n = (N_{\text{DMA}} \times 99.131) + 12880$

**Table S4.** Lower critical solution temperature (LCST), hydrodynamic diameter ( $D_h$ ), Polydispersities (PDI) for thermoresponsive block copolymers G and folic acid functionalized copolymer (H) determined by dynamic light scattering (DLS).

| Polymer code | DLS                    |                         |                  |
|--------------|------------------------|-------------------------|------------------|
|              | LCST (°C) <sup>a</sup> | $D_h$ (nm) <sup>b</sup> | PDI <sup>b</sup> |
| G            | 13 – 15                | $33.83 \pm 0.65$        | 0.017            |
| H            | 15 – 19                | $31.66 \pm 0.98$        | 0.089            |

<sup>a</sup>LCST determined by DLS (10 mg/mL)

<sup>b</sup>Hydrodynamic diameter ( $D_h$ ) and Polydispersity (PDI) determined by DLS (10 mg/mL) at 37 °C.

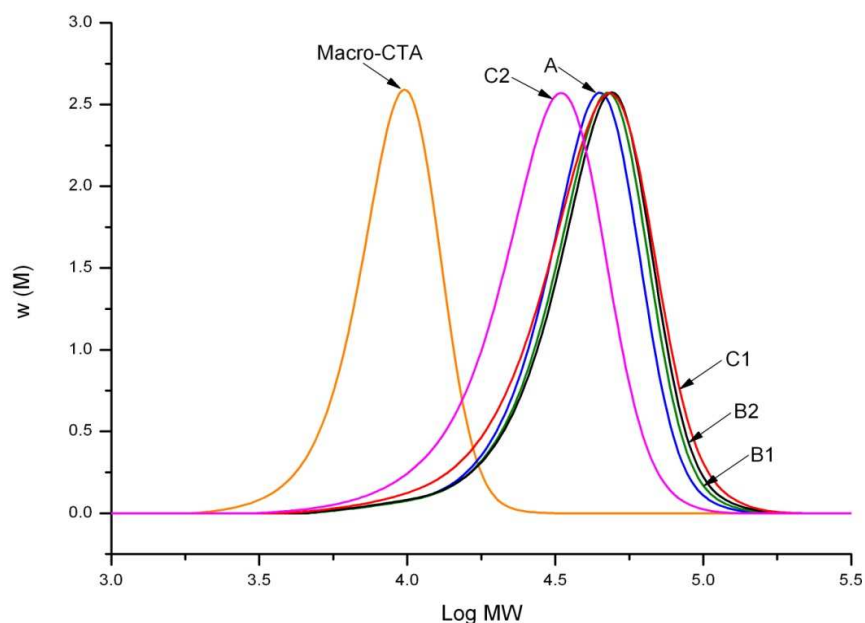

**Figure S1.** Size Exclusion Chromatography (SEC) traces of macro CTA; PDMA<sub>96</sub>, A; P(DMA<sub>96</sub>-b-(NIPAM<sub>87</sub>-co-DMAEA<sub>25</sub>)), B1; P(DMA<sub>96</sub>-b-(NIPAM<sub>88</sub>-co-DMAEA<sub>25</sub>-co-BA<sub>6</sub>)), B2; P(DMA<sub>96</sub>-b-(NIPAM<sub>91</sub>-co-DMAEA<sub>25</sub>-co-BA<sub>12</sub>)), C1; P(DMA<sub>96</sub>-b-(NIPAM<sub>84</sub>-co-DMAEA<sub>22</sub>-co-STY<sub>5</sub>)), C2; P(DMA<sub>96</sub>-b-(NIPAM<sub>40</sub>-co-DMAEA<sub>15</sub>-co-STY<sub>13</sub>)). The data were measured by DMAc SEC. The intensity for different distribution curves was normalized.

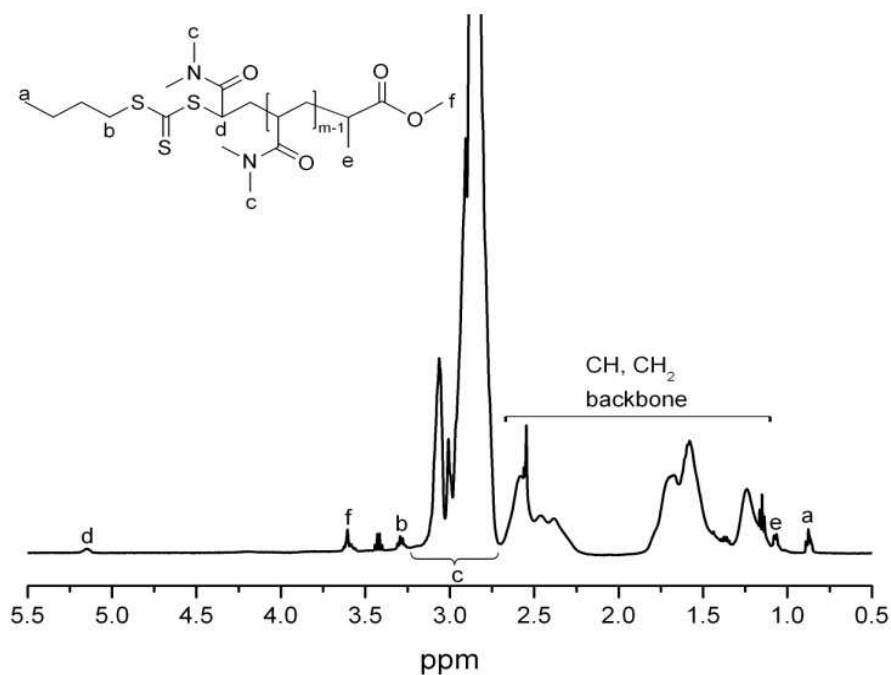

**Figure S2** <sup>1</sup>H NMR spectrum of Macro-CTA: PDMA<sub>96</sub> in CDCl<sub>3</sub>.

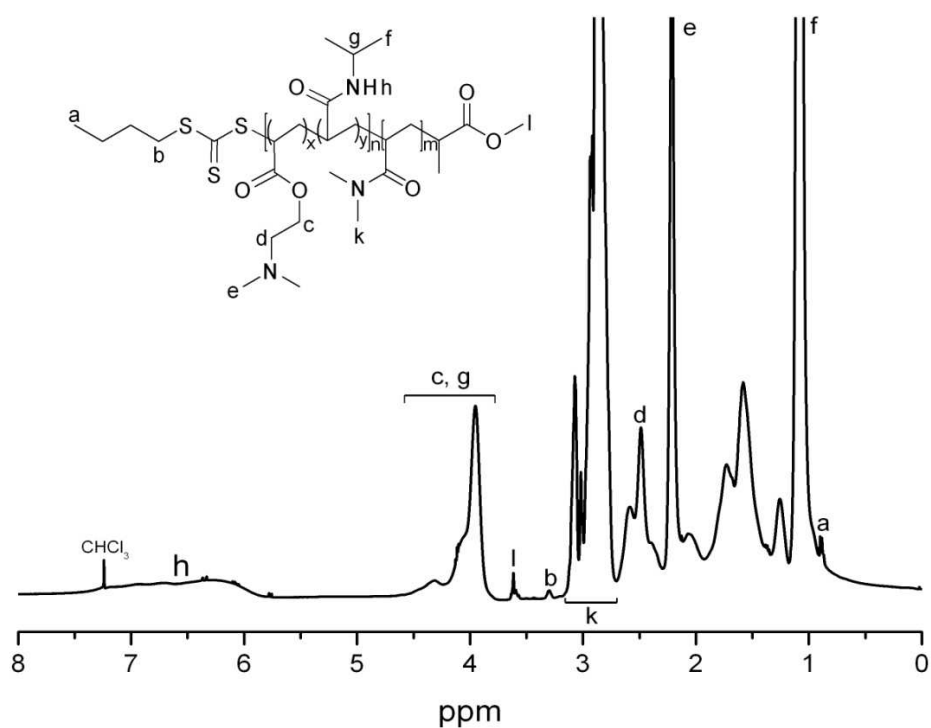

**Figure S3.**  $^1\text{H}$  NMR spectrum of A: P(DMA<sub>96</sub>-b-(NIPAM<sub>87</sub>-co-DMAEA<sub>25</sub>)) in  $\text{CDCl}_3$ .

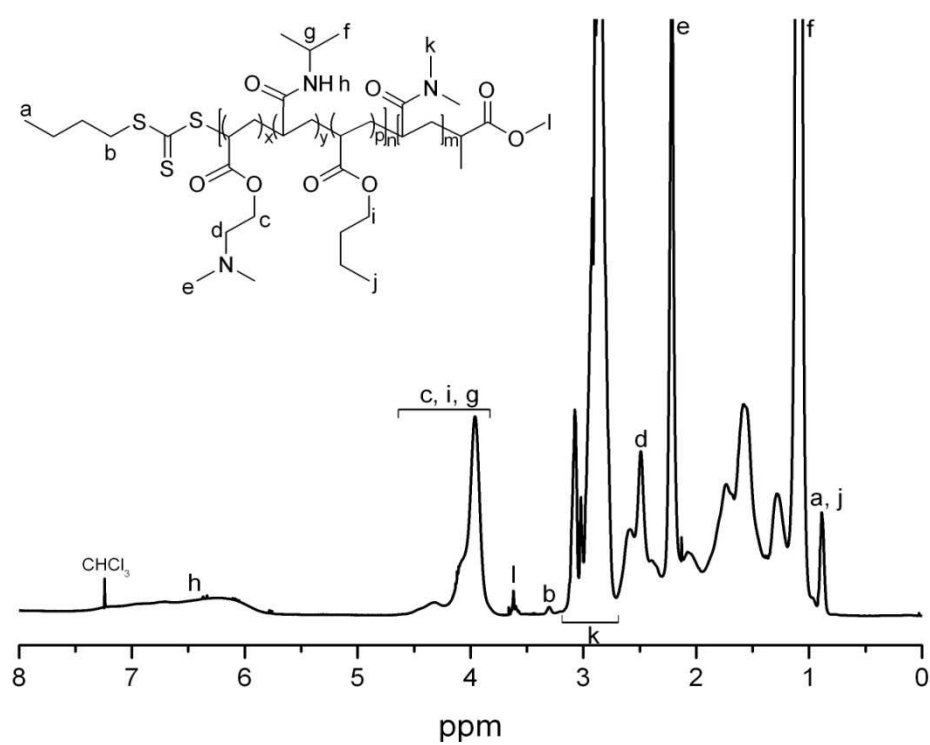

**Figure S4.**  $^1\text{H}$  NMR spectrum of B1: P(DMA<sub>96</sub>-b-(NIPAM<sub>88</sub>-co-DMAEA<sub>25</sub>-co-BA<sub>6</sub>)) in  $\text{CDCl}_3$ .



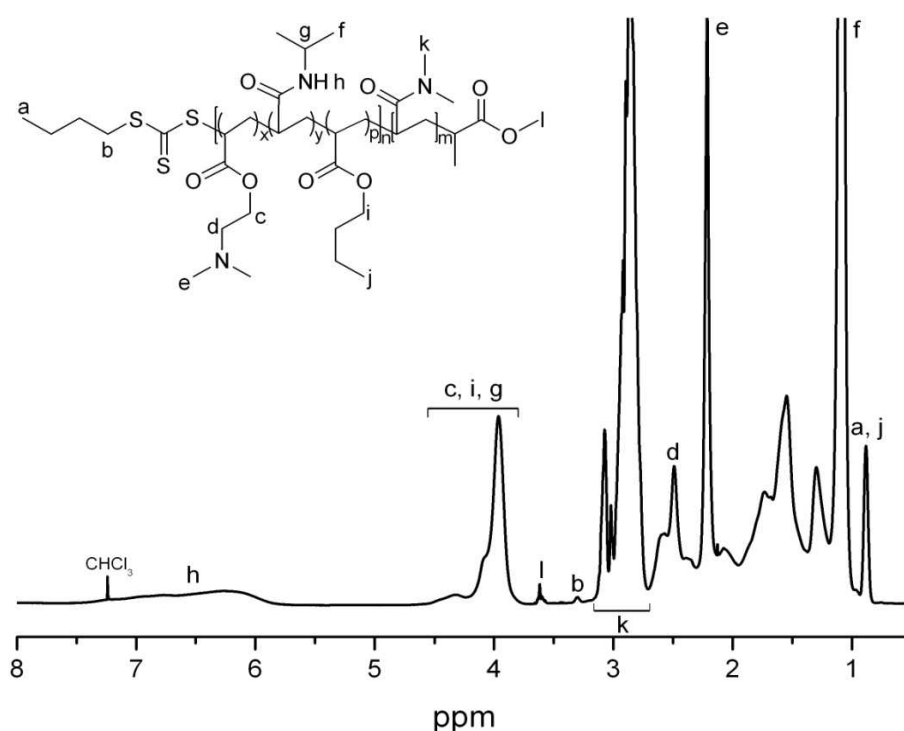

**Figure S5.**  $^1\text{H}$  NMR spectrum of B2: P(DMA<sub>96</sub>-b-(NIPAM<sub>91</sub>-co-DMAEA<sub>25</sub>-co-BA<sub>12</sub>)) in CDCl<sub>3</sub>.

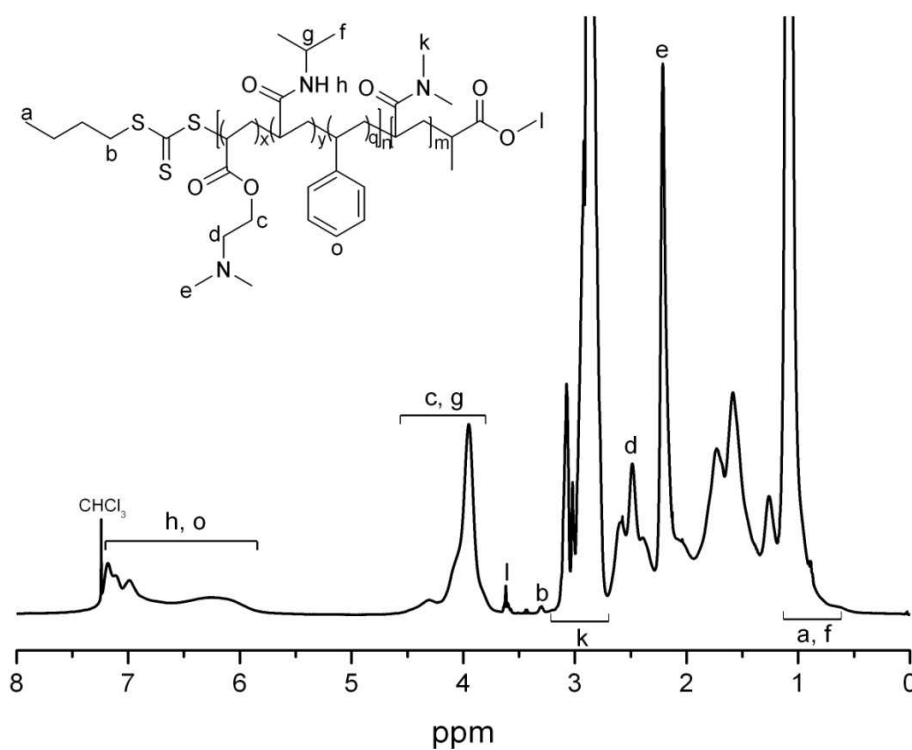

**Figure S6.**  $^1\text{H}$  NMR spectrum of C1: P(DMA<sub>96</sub>-b-(NIPAM<sub>84</sub>-co-DMAEA<sub>22</sub>-co-STY<sub>5</sub>)) in CDCl<sub>3</sub>.

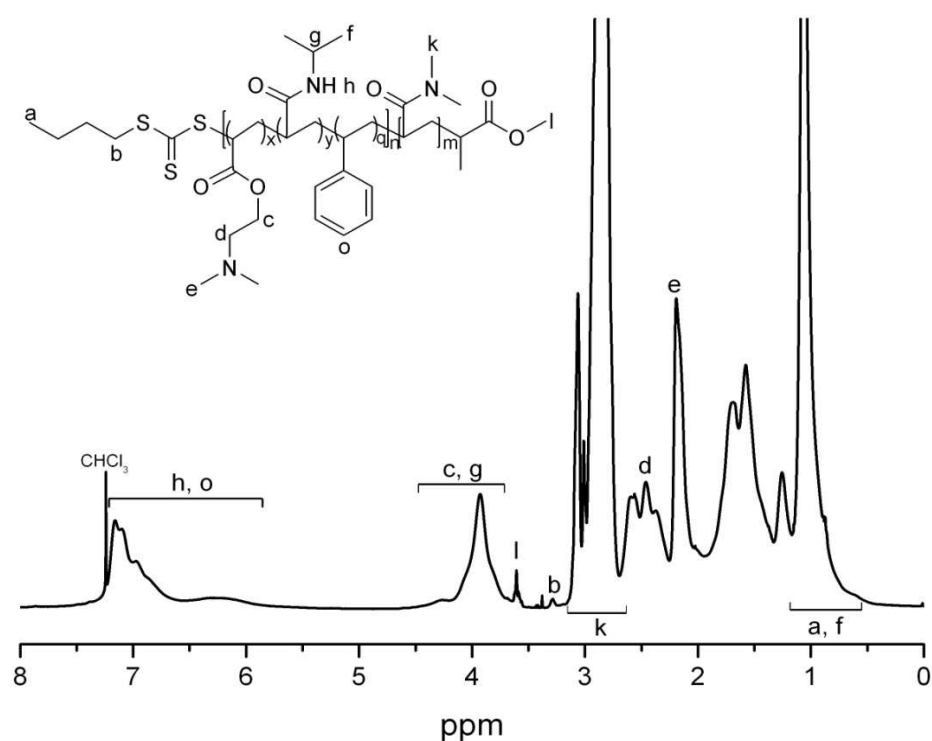

**Figure S7.**  $^1\text{H}$  NMR spectrum of C2: P(DMA<sub>96</sub>-b-(NIPAM<sub>40</sub>-co-DMAEA<sub>15</sub>-co-STY<sub>13</sub>)) in CDCl<sub>3</sub>.

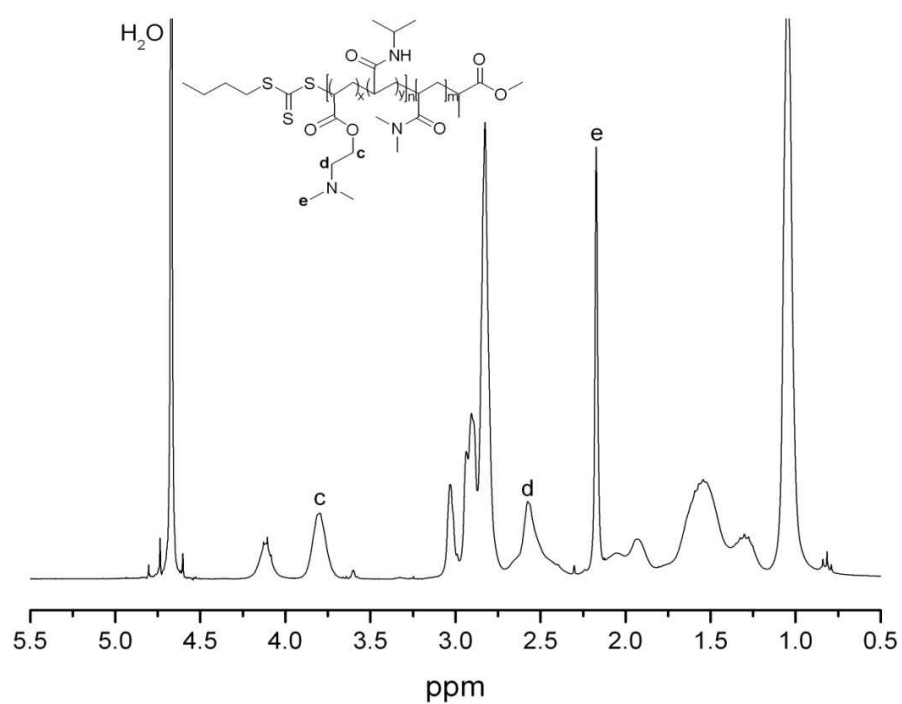

**Figure S8.**  $^1\text{H}$  NMR spectrum of A: P(DMA<sub>96</sub>-b-(NIPAM<sub>87</sub>-co-DMAEA<sub>25</sub>)) after being dissolved in D<sub>2</sub>O and immediately measured at 25 °C.

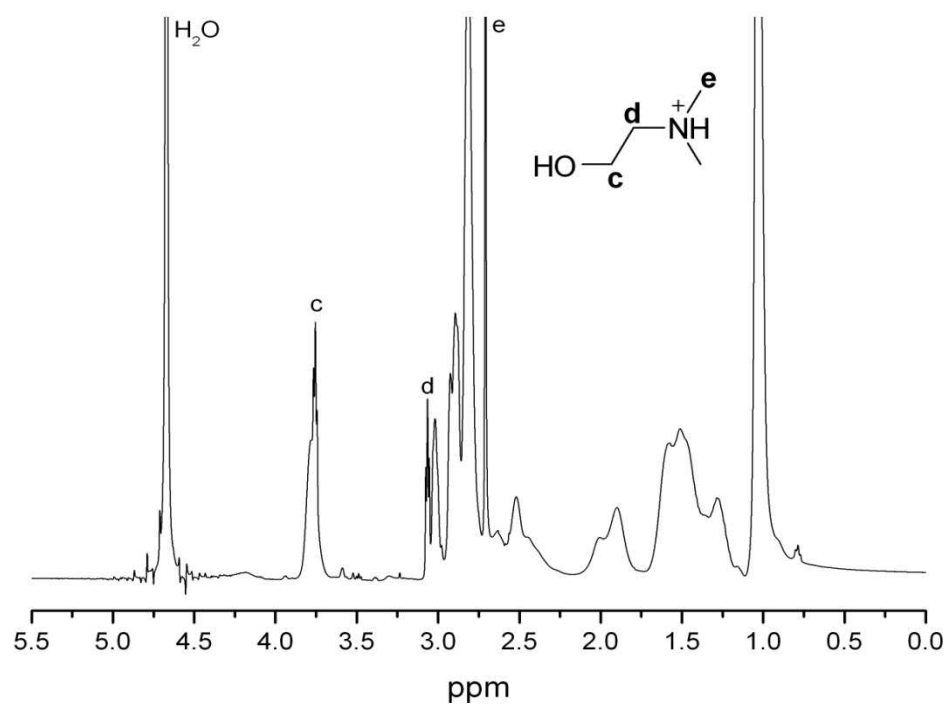

**Figure S9.**  $^1\text{H}$  NMR spectrum of A;  $\text{P}(\text{DMA}_{96}\text{-b-(NIPAM}_{87}\text{-co-DMAEA}_{25}))$  after being dissolved and kept in  $\text{D}_2\text{O}$  for 80 h. The spectrum was measured at 25  $^\circ\text{C}$ .

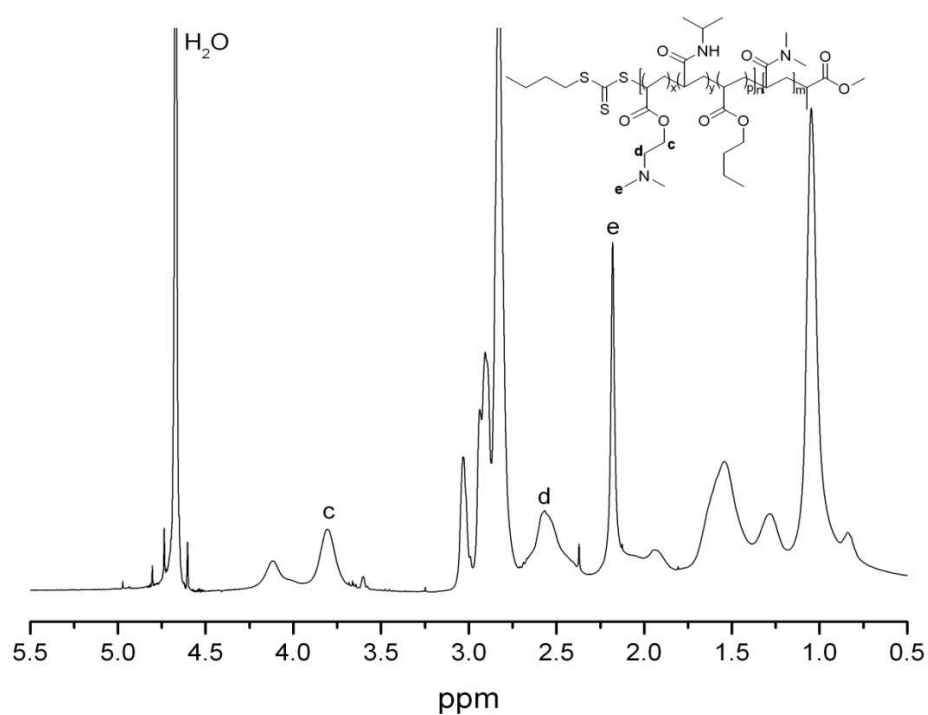

**Figure S10.**  $^1\text{H}$  NMR spectrum of B1:  $\text{P}(\text{DMA}_{96}\text{-b-(NIPAM}_{88}\text{-co-DMAEA}_{25}\text{-co-BA}_6))$  after being dissolved in  $\text{D}_2\text{O}$  and immediately measured at 25  $^\circ\text{C}$ .

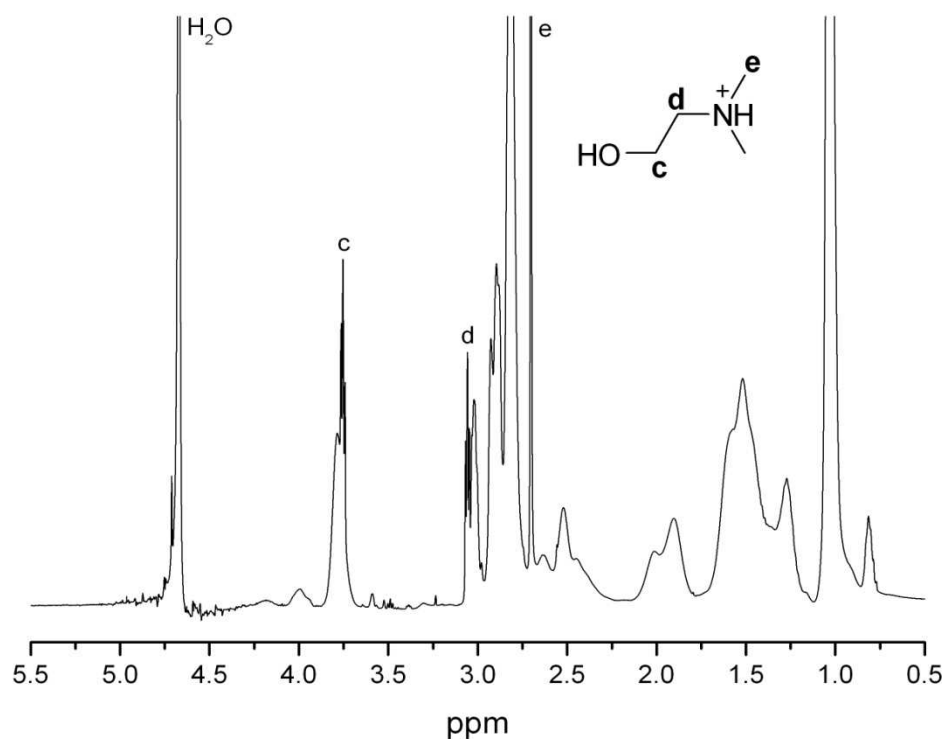

**Figure S11.**  $^1\text{H}$  NMR spectrum of B1:  $\text{P(DMA}_{96}\text{-b-(NIPAM}_{88}\text{-co-DMAEA}_{25}\text{-co-BA}_6\text{))}$  after being dissolved and kept in  $\text{D}_2\text{O}$  for 80 h. The spectrum was measured at 25  $^\circ\text{C}$ .

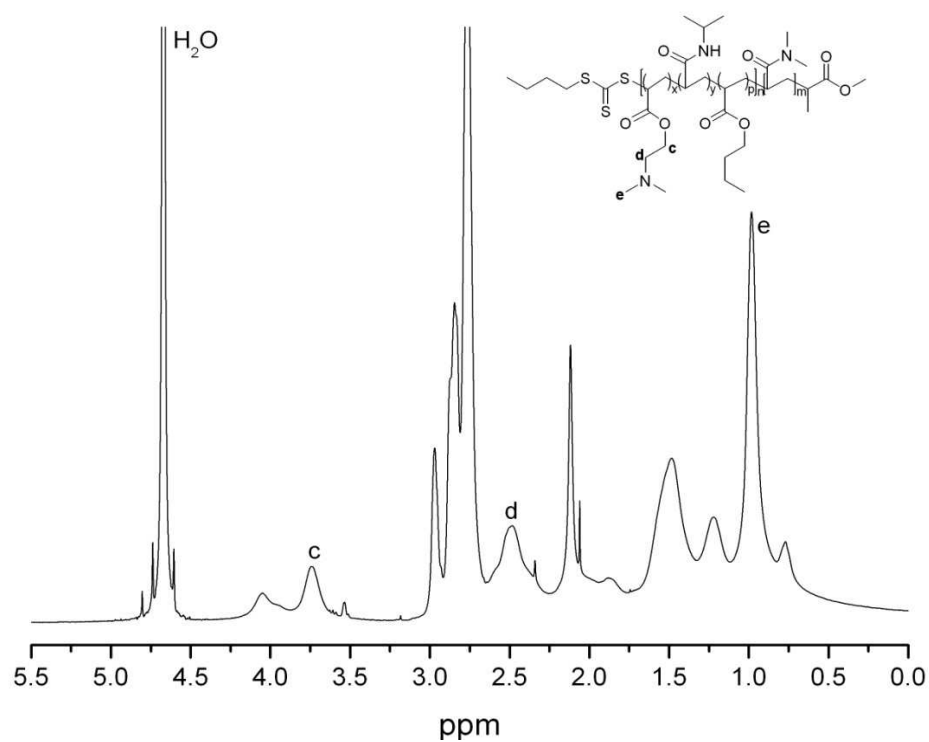

**Figure S12.**  $^1\text{H}$  NMR spectrum of B2:  $\text{P(DMA}_{96}\text{-b-(NIPAM}_{91}\text{-co-DMAEA}_{25}\text{-co-BA}_{12}\text{))}$  after being dissolved in  $\text{D}_2\text{O}$  and immediately measured at 15  $^\circ\text{C}$ .

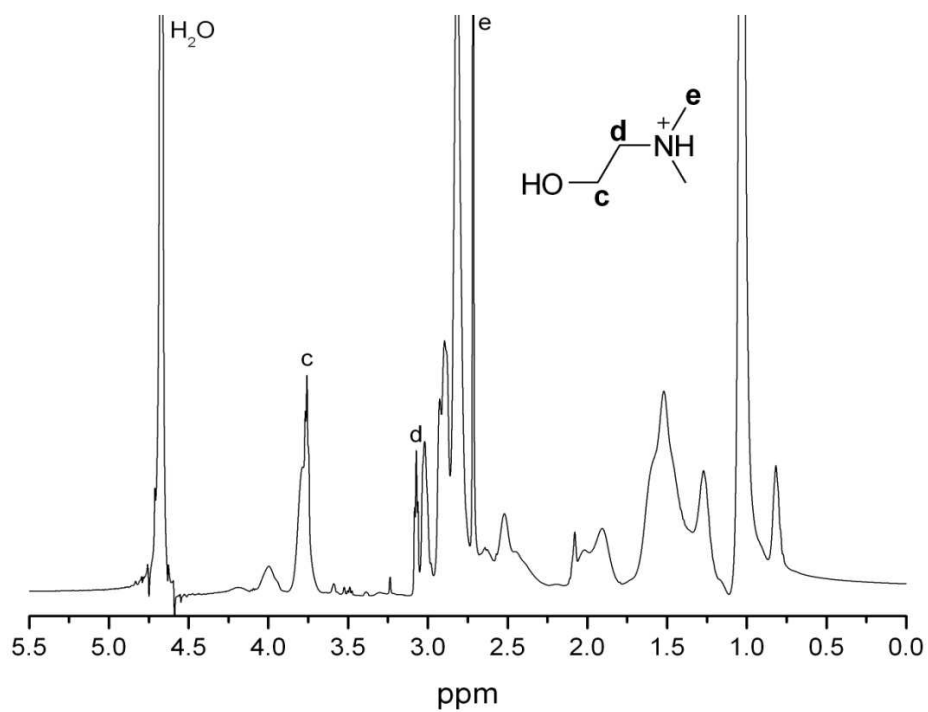

**Figure S13.**  $^1\text{H}$  NMR spectrum of B2: P(DMA<sub>96</sub>-b-(NIPAM<sub>91</sub>-co-DMAEA<sub>25</sub>-co-BA<sub>12</sub>)) after being dissolved and kept in D<sub>2</sub>O for 80 h. The spectrum was measured at 25 °C.

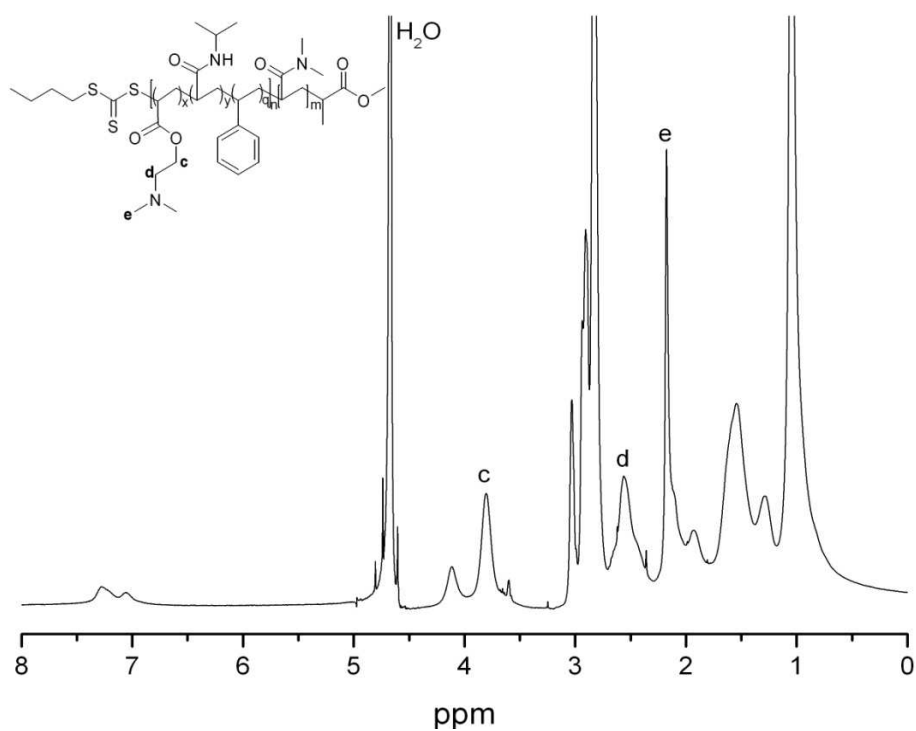

**Figure S14.**  $^1\text{H}$  NMR spectrum of C1: P(DMA<sub>96</sub>-b-(NIPAM<sub>84</sub>-co-DMAEA<sub>22</sub>-co-STY<sub>5</sub>)) after being dissolved in D<sub>2</sub>O and immediately measured at 25 °C.

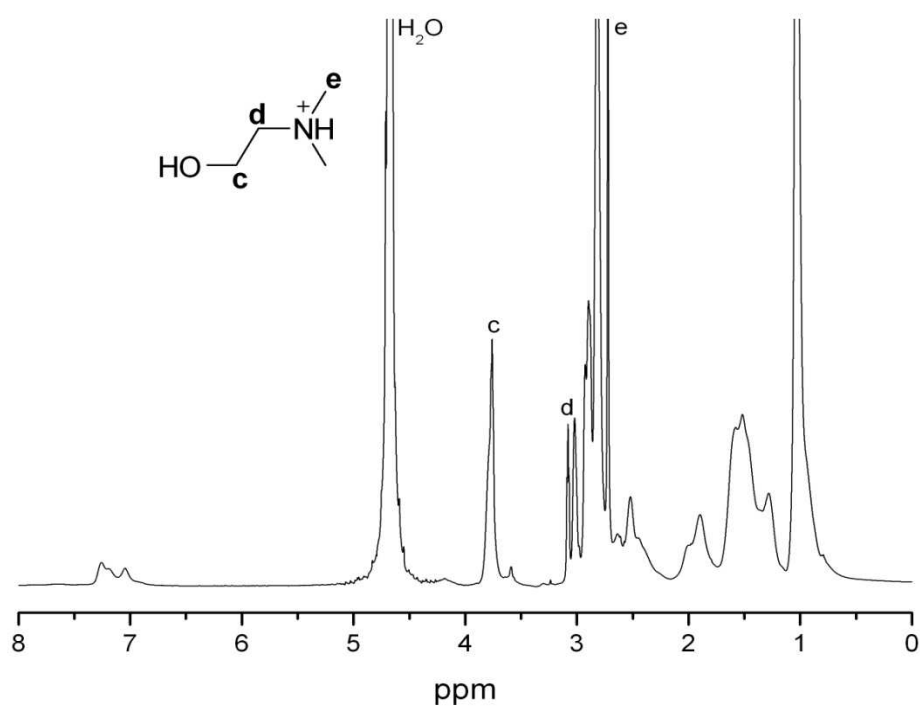

**Figure S15.**  $^1\text{H}$  NMR spectrum of C1:  $\text{P}(\text{DMA}_{96}\text{-b-(NIPAM}_{84}\text{-co-DMAEA}_{22}\text{-co-STY}_5)$  after being dissolved and kept in  $\text{D}_2\text{O}$  for 80 h. The spectrum was measured at  $25\text{ }^\circ\text{C}$ .

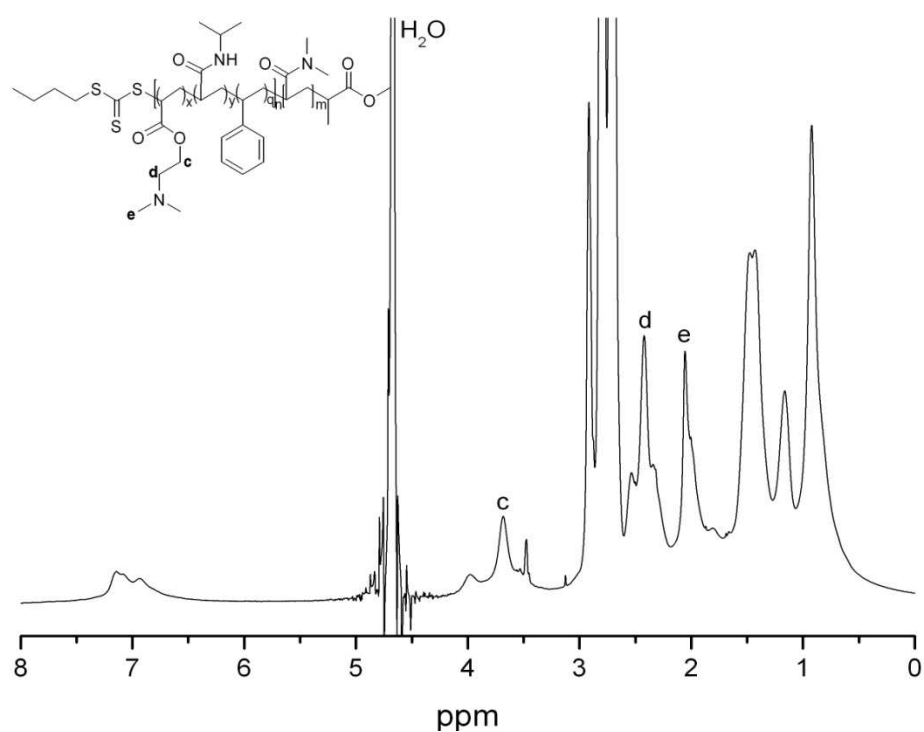

**Figure S16.**  $^1\text{H}$  NMR spectrum of C2:  $\text{P}(\text{DMA}_{96}\text{-b-(NIPAM}_{40}\text{-co-DMAEA}_{15}\text{-co-STY}_{13}))$  after being dissolved in  $\text{D}_2\text{O}$  and immediately measured at  $15\text{ }^\circ\text{C}$ .

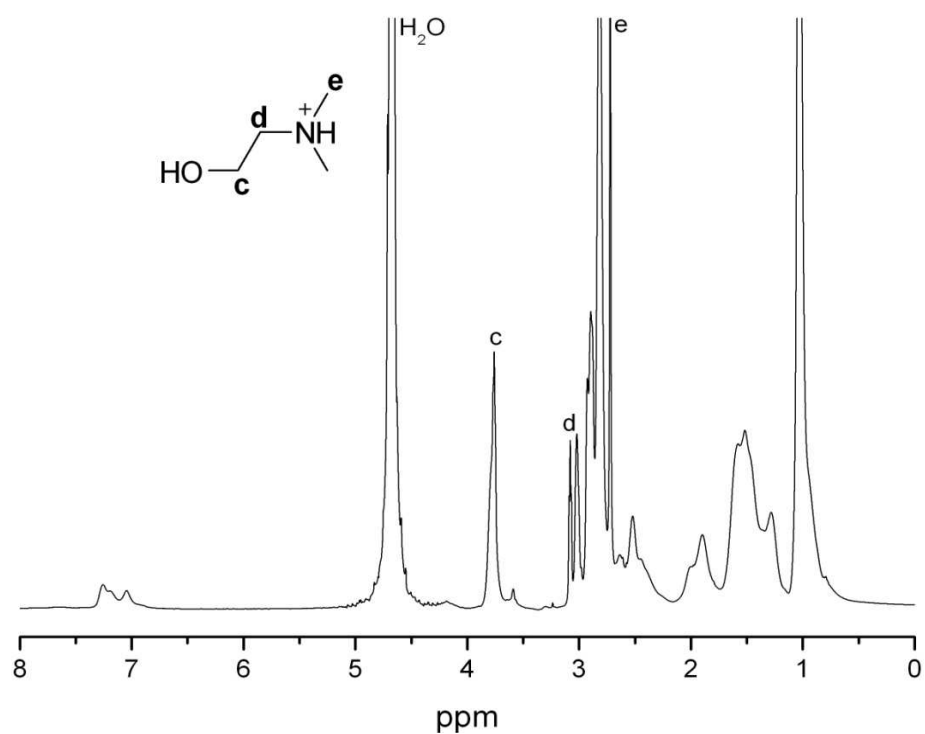

**Figure S17.**  $^1\text{H}$  NMR spectrum of C2: P(DMA<sub>96</sub>-b-(NIPAM<sub>40</sub>-co-DMAEA<sub>15</sub>-co-STY<sub>13</sub>)) after being dissolved and kept in D<sub>2</sub>O for 80 h. The spectrum was measured at 25 °C.

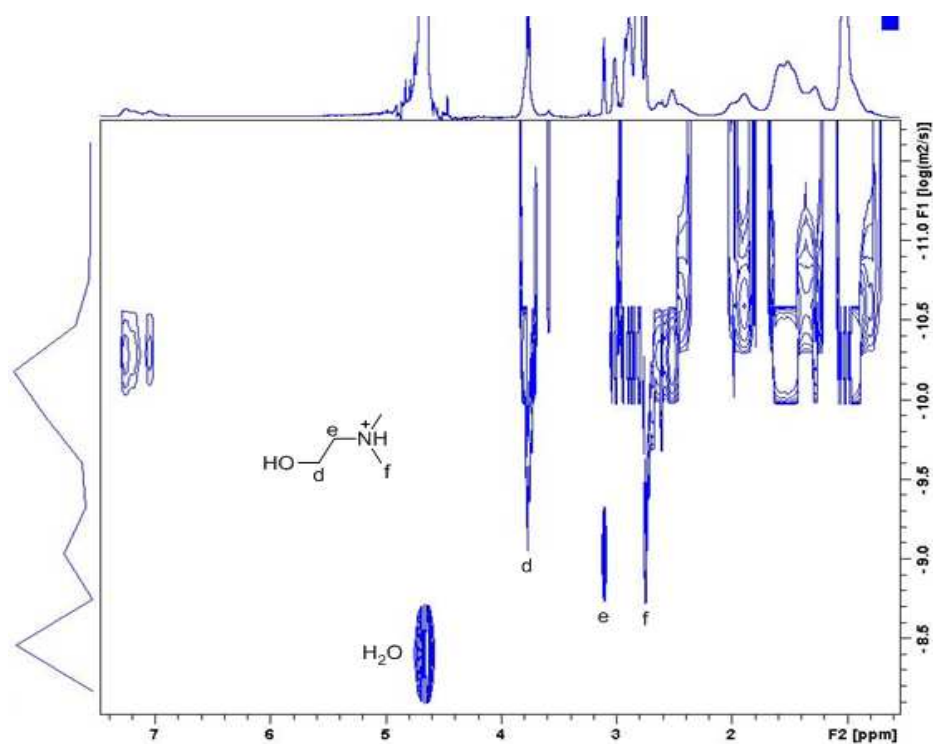

**Figure S18.** DOSY NMR spectrum of C1: P(DMA<sub>96</sub>-b-(NIPAM<sub>84</sub>-co-DMAEA<sub>22</sub>-co-STY<sub>5</sub>)) after being dissolved in D<sub>2</sub>O for 80h. The spectrum was measured at 25 °C.

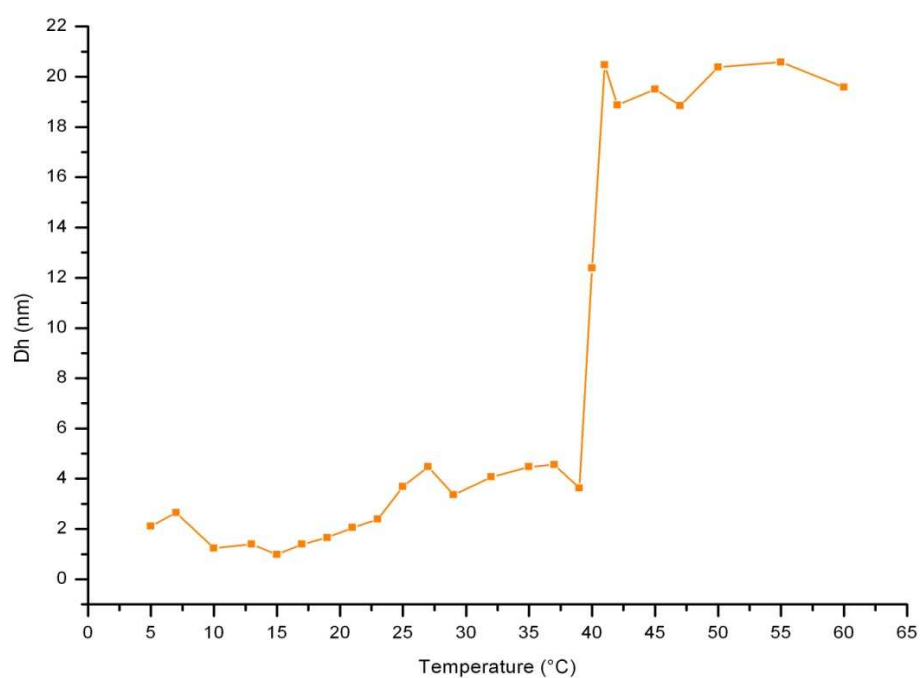

**Figure S19.** LCST of A: P(DMA<sub>96</sub>-b-(NIPAM<sub>87</sub>-co-DMAEA<sub>25</sub>)). The data were reported as average numbers from five measurements on DLS machine at concentration 10 mg/mL.

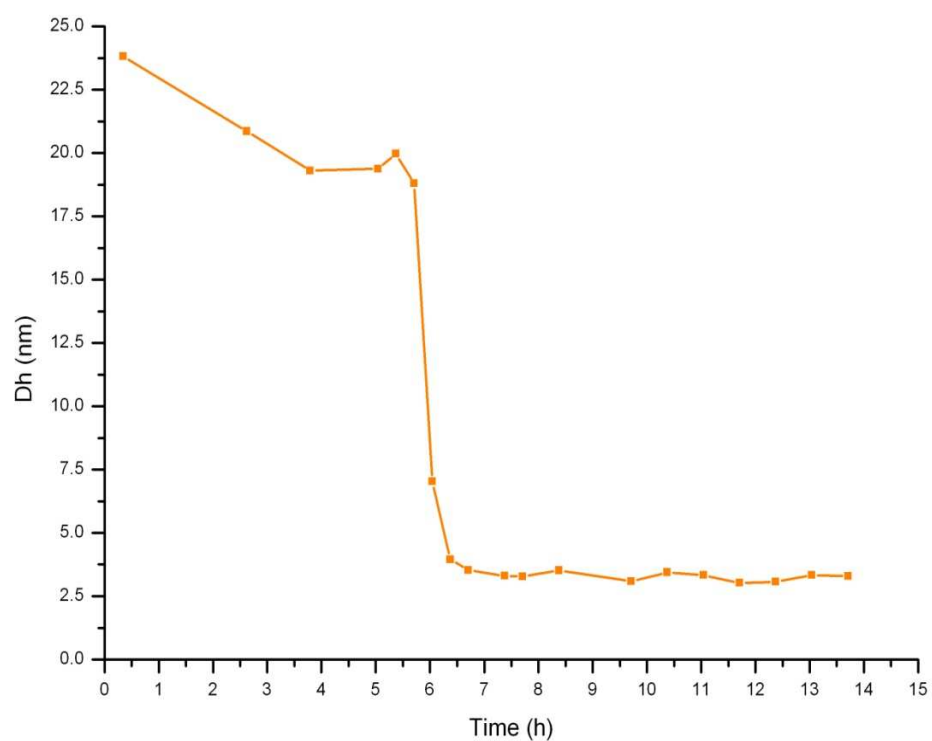

**Figure S20.** Degradation kinetic of A: P(DMA<sub>96</sub>-b-(NIPAM<sub>87</sub>-co-DMAEA<sub>25</sub>)). The data were averaged from five measurements on DLS machine at polymer solution concentration 5 mg/mL at 45 °C.



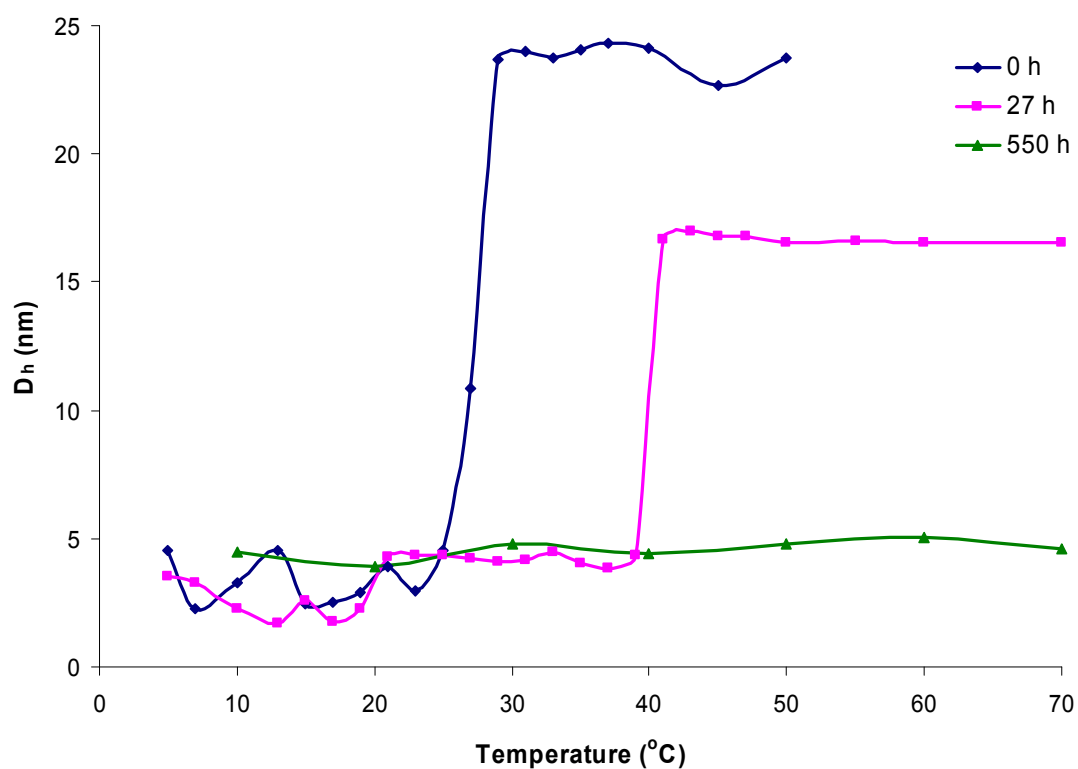

**Figure S21.** LCST of B1: P(DMA<sub>96</sub>-b-(NIPAM<sub>88</sub>-co-DMAEA<sub>25</sub>-co-BA<sub>6</sub>)) at different times after the polymer was dissolved in water. The data were reported as average numbers from five measurements on DLS machine at concentration 10 mg/mL.

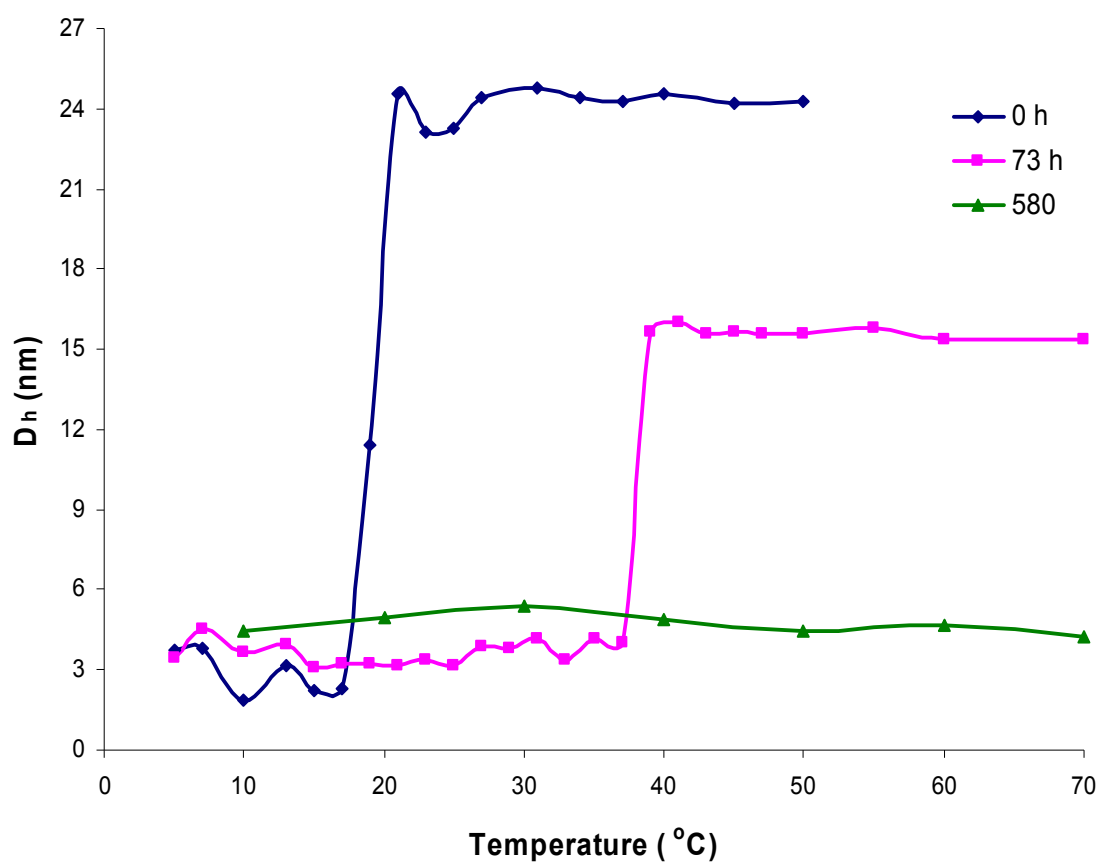

**Figure S22.** LCST of B2: P(DMA<sub>96</sub>-b-(NIPAM<sub>91</sub>-co-DMAEA<sub>25</sub>-co-BA<sub>12</sub>)) at different times after the polymer was dissolved in water. The data were reported as average numbers from five measurements on DLS machine at concentration 10 mg/mL.

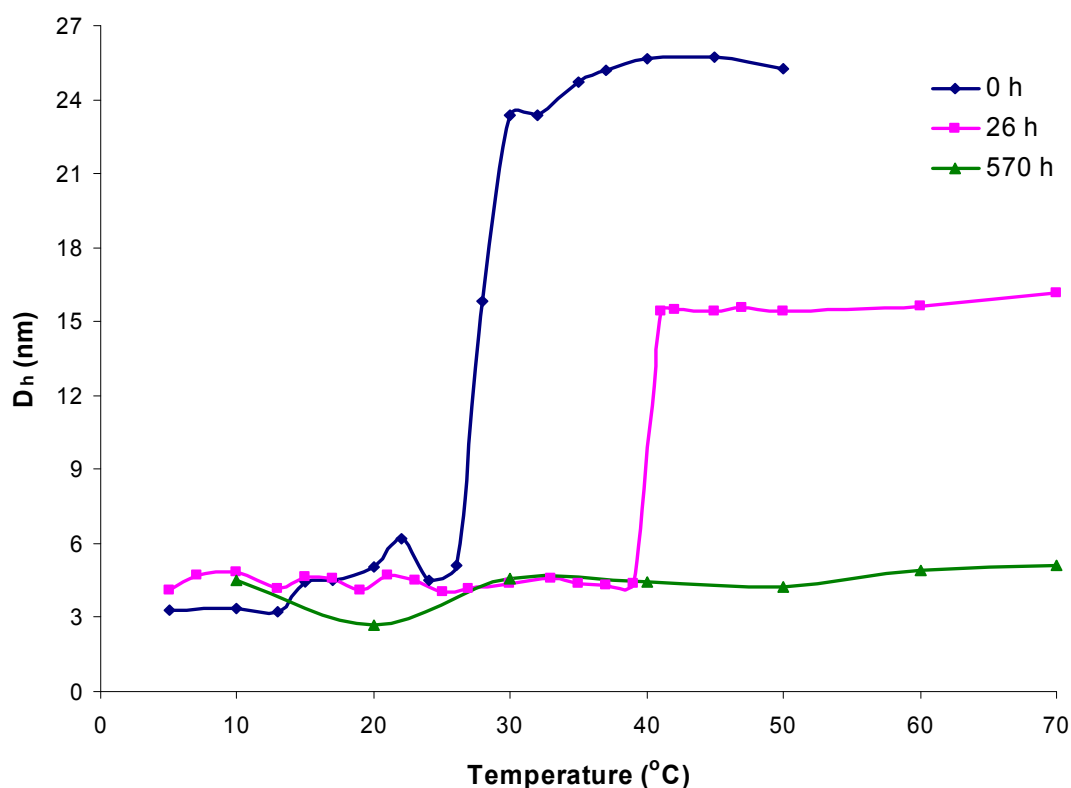

**Figure S23.** LCST of C1: P(DMA<sub>96</sub>-b-(NIPAM<sub>84</sub>-co-DMAEA<sub>22</sub>-co-STY<sub>5</sub>) at different times after the polymer was dissolved in water. The data were reported as average numbers from five measurements on DLS machine at concentration 10 mg/mL

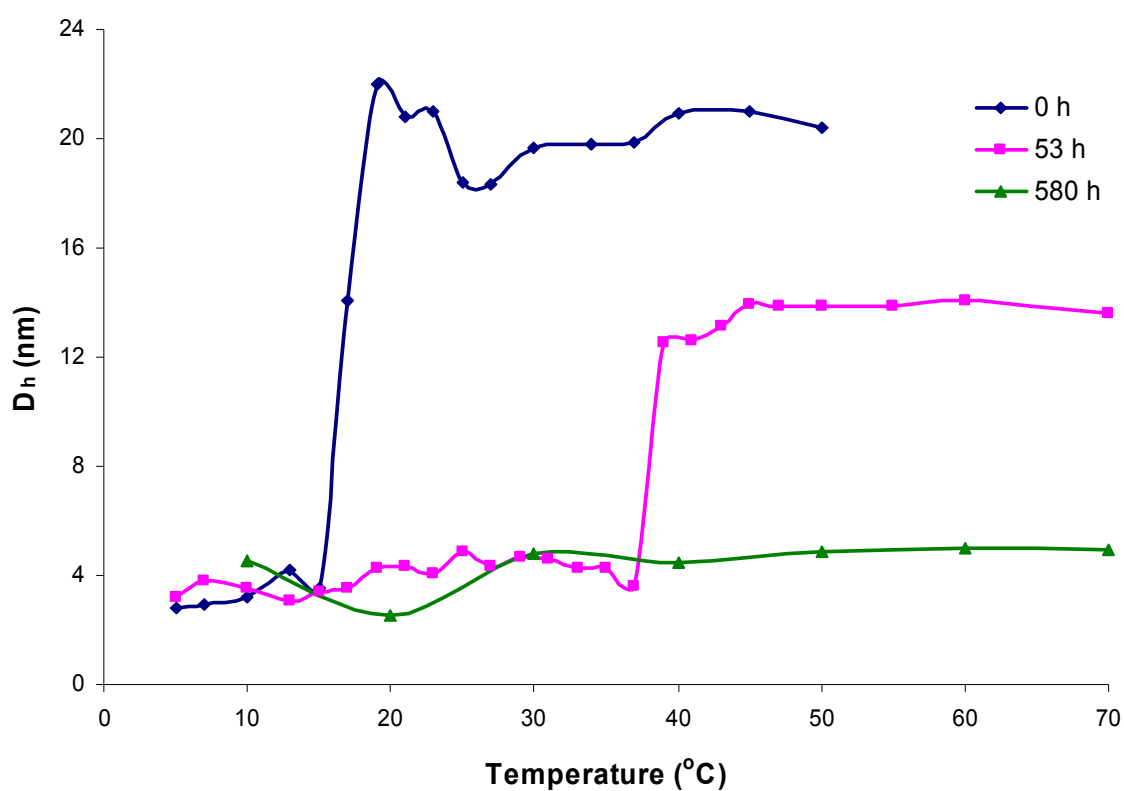

**Figure S24.** LCST of C2: P(DMA<sub>96</sub>-b-(NIPAM<sub>40</sub>-co-DMAEA<sub>15</sub>-co-STY<sub>13</sub>)) at different times after the polymer was dissolved in water. The data were reported as average numbers from five measurements on DLS machine at concentration 10 mg/mL.

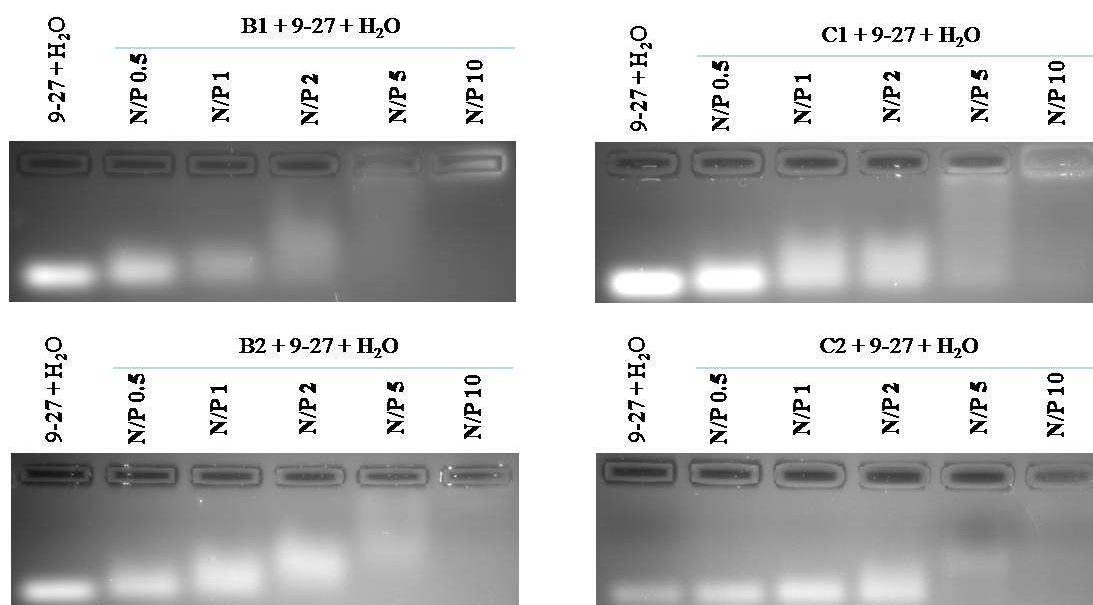

**Figure S25.** Agarose gel assay of Oigo DNA 9-27 / thermoresponsive block copolymers complexes in Milli-Q water at N/P Ratio 0.5, 1, 2, 5, and 10. B1: P(DMA<sub>96</sub>-b-(NIPAM<sub>88</sub>-co-DMAEA<sub>25</sub>-co-BA<sub>6</sub>)), B2: P(DMA<sub>96</sub>-b-(NIPAM<sub>91</sub>-co-DMAEA<sub>25</sub>-co-BA<sub>12</sub>)), C1: P(DMA<sub>96</sub>-b-(NIPAM<sub>84</sub>-co-DMAEA<sub>22</sub>-co-STY<sub>5</sub>)), C2: P(DMA<sub>96</sub>-b-(NIPAM<sub>40</sub>-co-DMAEA<sub>15</sub>-co-STY<sub>13</sub>)). Soluble copolymers in Milli-Q water were incubated with DNA at different N/P ratios at below their LCST for 30 min and then being heated up to 37 °C for 15 min before doing Agarose gel retardation assay.

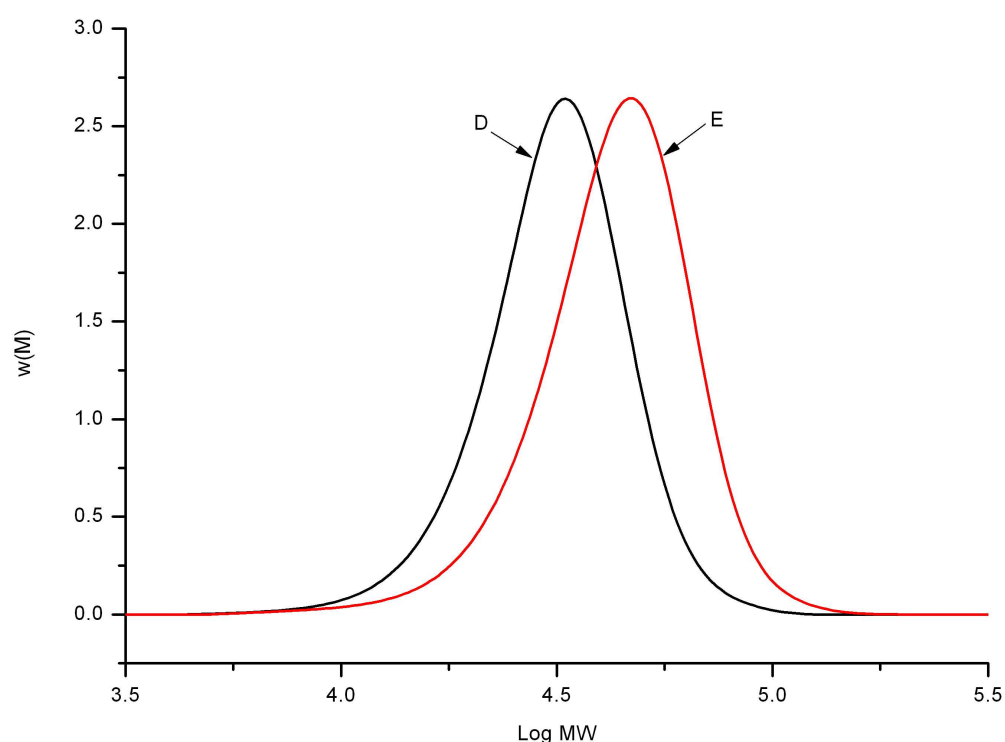

**Figure S26.** Size Exclusion Chromatography (SEC) traces of D: P(NIPAM<sub>97</sub>-co-BA<sub>13</sub>)) and E: P(DMA<sub>99</sub>-b-(NIPAM<sub>97</sub>-co-BA<sub>13</sub>)). The samples were measured by DMAc SEC. The intensity for different distribution curves was normalized.

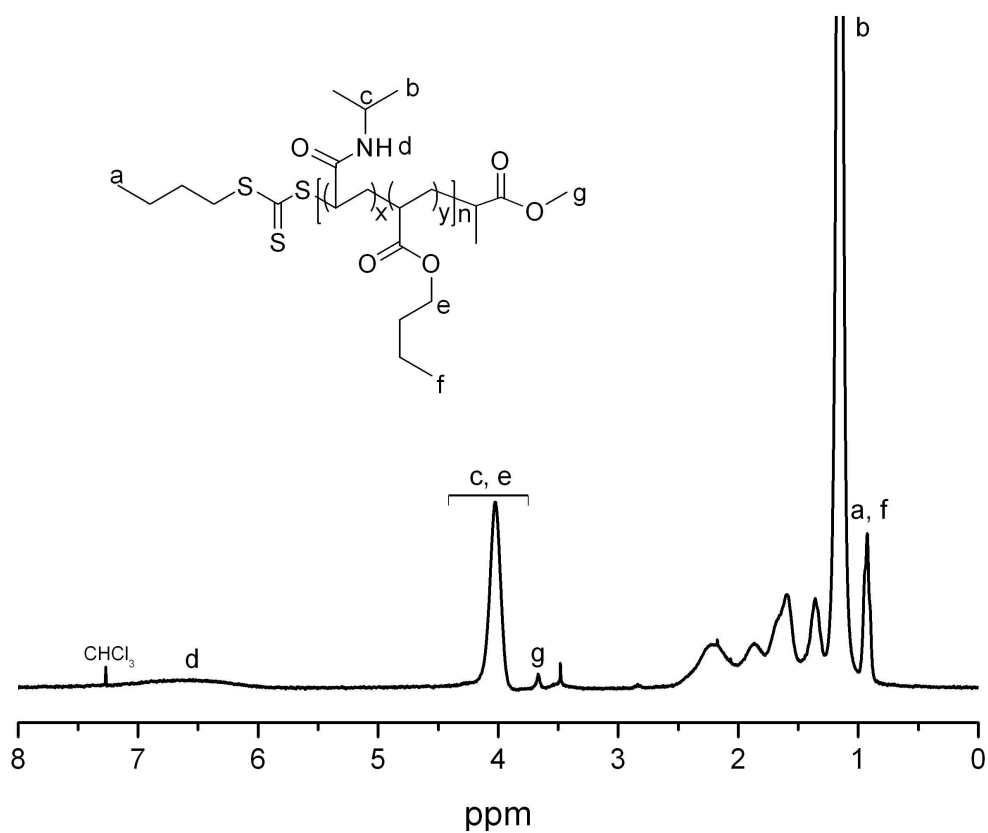

**Figure S27.** <sup>1</sup>H NMR spectrum of **D**: P(NIPAM<sub>97</sub>-co-BA<sub>13</sub>)) in CDCl<sub>3</sub>

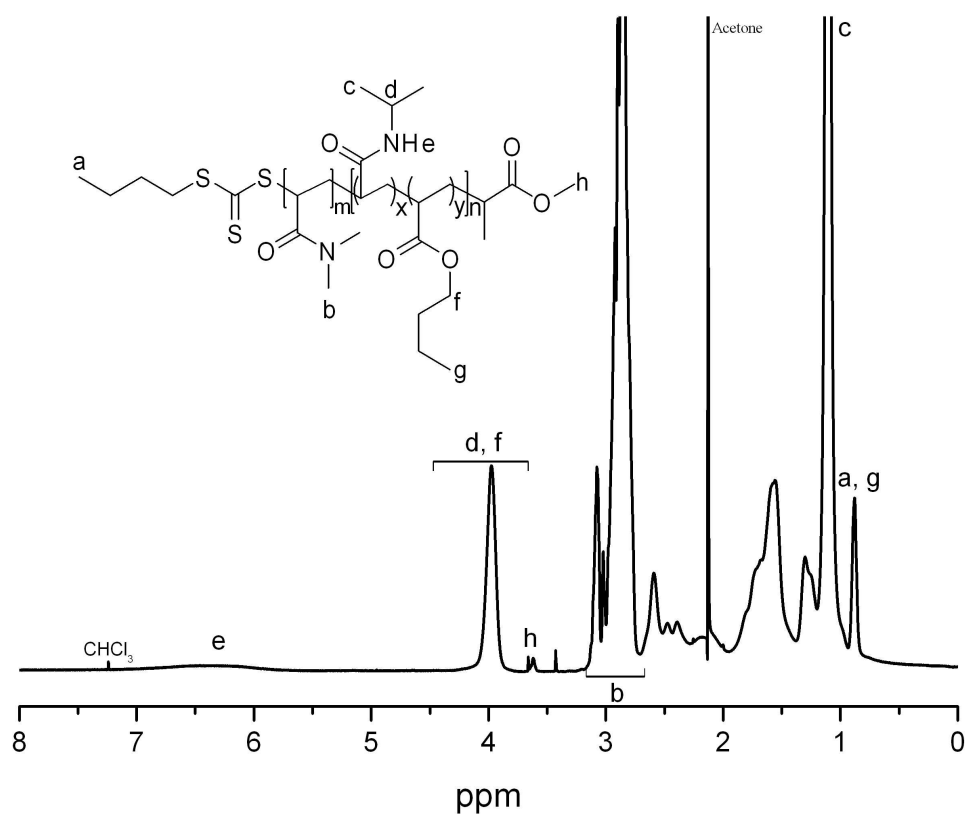

**Figure S28.** <sup>1</sup>H NMR spectrum of **E**: P(DMA<sub>99</sub>-b-(NIPAM<sub>97</sub>-co-BA<sub>13</sub>)) in CDCl<sub>3</sub>

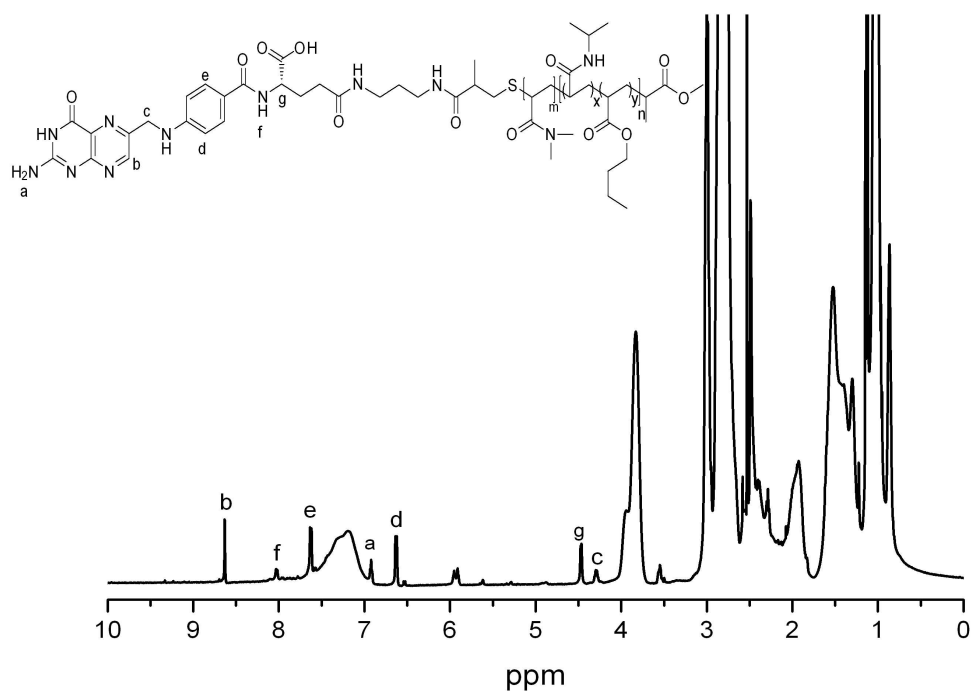

**Figure S29** 1D DOSY NMR spectrum of folic acid conjugated copolymer E, PDMA-b-P(NIPAM-co-BA) in DMSO- $d_6$ .

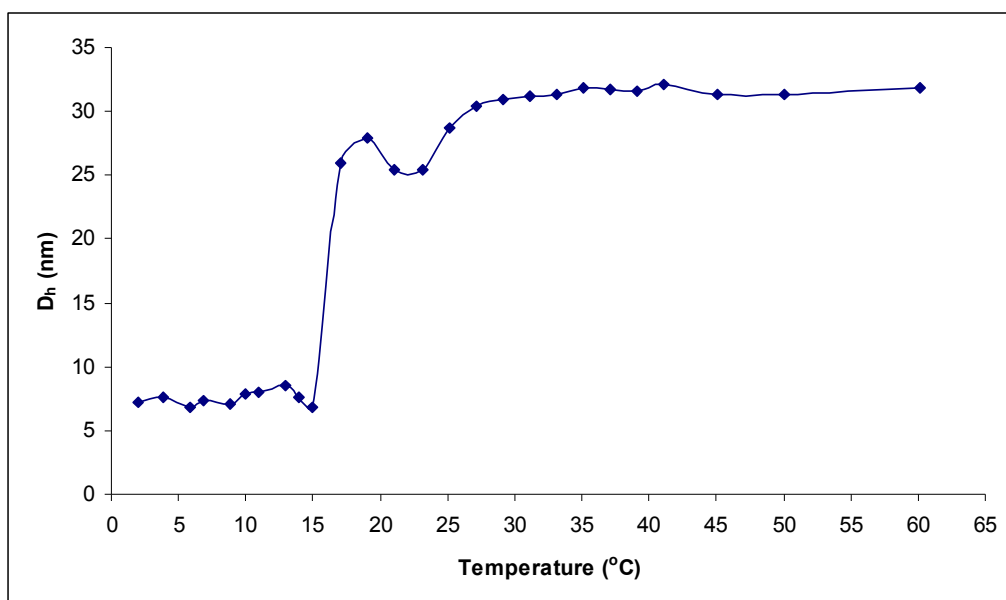

**Figure S30.** LCST of folic acid conjugated copolymer E, PDMA-b-P(NIPAM-co-BA) in DMSO- $d_6$ . The polymer was dissolved in water. The data were reported as average numbers from five measurements on DLS machine at concentration 10 mg/mL. LCST = 15 – 19 °C.

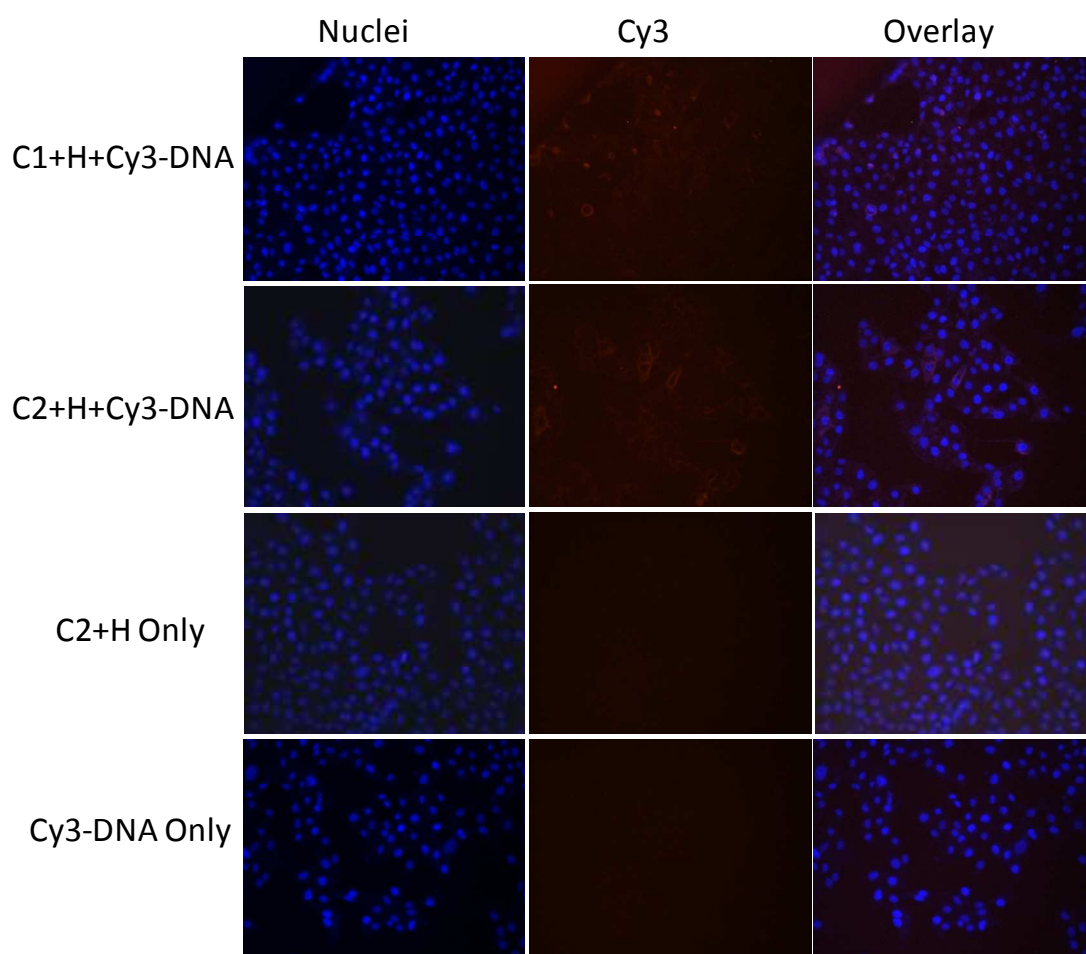

**Figure S31:** Fluorescent microscopy photos of the osteosarcoma U2OS cells which were dosed with 50 nM Cy3 oligo DNA and copolymer polyplexes and cultured in 24-well plate ( $1 \times 10^5$ /well) in completed DMEM medium. The polyplexes were prepared in the ratio to siRNA as 50:1 in water. The mixtures were incubated in ice-bath for 10 minutes and then at 37°C for 30 minutes. They were then added to the cells and were incubated for 10 hours before washing with PBS buffer and fixation with 4% paraformaldehyde. The cell nuclei were stained with Hoechst 33341 and cell uptake was viewed under fluorescent microscope.

## Reference

1. Urbani, C. N.; Monteiro, M. J. *Macromolecules* **2009**, *42*, 3884-3886.
